# Supplementary material
Source: ML conference proceedings conference paper supplement (https://proceedings.neurips.cc/paper_files/paper/2019/hash/195f15384c2a79cedf293e4a847ce85c-Abstract.html)
Supplement: Supplementary file [file 195f15384c2a79cedf293e4a847ce85c-Supplemental.zip]

## A Proofs

### A.1 Proof of Theorem 1

**Lemma 1.** *For any initial state  $x$ , a state  $y$  that can occur on a trajectory  $\tau \sim \mathcal{T}(x, \pi)$ , that is:  $\mathbb{P}_{\tau \sim \mathcal{T}(x, \pi)}(X_k = y) \neq 0$  for some  $k$  an action  $a$  for which  $\pi(a|x) \neq 0$ , we have:*

$$\frac{h_k(a|x, y)}{\pi(a|x)} = \frac{\mathbb{P}_{\tau \sim \mathcal{T}(x, \pi)}(X_k = y|A_0 = a)}{\mathbb{P}_{\tau \sim \mathcal{T}(x, \pi)}(X_k = y)}. \quad (9)$$

*Proof.* From Bayes' rule, we have:

$$\begin{aligned} \mathbb{P}_{\tau \sim \mathcal{T}(x, \pi)}(X_k = y|A_0 = a) &= \frac{\mathbb{P}_{\tau \sim \mathcal{T}(x, \pi)}(A_0 = a|X_k = y)\mathbb{P}_{\tau \sim \mathcal{T}(x, \pi)}(X_k = y)}{\mathbb{P}_{\tau \sim \mathcal{T}(x, \pi)}(A_0 = a)}, \\ &= \frac{\mathbb{P}_{\tau \sim \mathcal{T}(x, \pi)}(X_k = y)h_k(a|x, y)}{\pi(a|x)}. \end{aligned}$$

□

*Proof of Theorem 1.* From the definition of the Q-function for a state-action pair  $(x, a)$ , we have

$$Q^\pi(x, a) = r(x, a) + \sum_{k \geq 1} \sum_{y \in \mathcal{X}} \gamma^k \mathbb{P}_{\tau \sim \mathcal{T}(x, \pi)}(X_k = y|A_0 = a) r^\pi(y), \quad (10)$$

where  $r^\pi(y) = \sum_{a \in \mathcal{A}} \pi(a|y) r(y, a)$ .

Combining Eq. (9) with Eq. (10) we deduce

$$\begin{aligned} Q^\pi(x, a) &= r(x, a) + \sum_{y \in \mathcal{X}} \sum_{k \geq 1} \gamma^k \mathbb{P}_{\tau \sim \mathcal{T}(x, \pi)}(X_k = y) \frac{h_k(a|x, y)}{\pi(a|x)} r^\pi(y), \\ &= r(x, a) + \mathbb{E}_{\tau \sim \mathcal{T}(x, \pi)} \left[ \sum_{k \geq 1} \gamma^k \frac{h_k(a|X_k, x)}{\pi(a|x)} R_k \right]. \end{aligned}$$

□

### A.2 Proof of Theorem 2

*Proof.* For any action  $a$ , the value function writes as

$$\begin{aligned} V^\pi(x) &= \mathbb{E}_{\tau \sim \mathcal{T}(x, \pi)} [Z(\tau)], \\ &= \int_z z \mathbb{P}_{\tau \sim \mathcal{T}(x, \pi)}(Z(\tau) = z) dz, \\ &= \int_z z \frac{\mathbb{P}_{\tau \sim \mathcal{T}(x, \pi)}(Z(\tau) = z)}{\mathbb{P}_{\tau \sim \mathcal{T}(x, a, \pi)}(Z(\tau) = z)} \mathbb{P}_{\tau \sim \mathcal{T}(x, a, \pi)}(Z(\tau) = z) dz, \\ &= \int_z z \frac{\mathbb{P}_{\tau \sim \mathcal{T}(x, \pi)}(Z(\tau) = z)}{\mathbb{P}_{\tau \sim \mathcal{T}(x, \pi)}(Z(\tau) = z|A_0 = a)} \mathbb{P}_{\tau \sim \mathcal{T}(x, a, \pi)}(Z(\tau) = z) dz, \\ &\stackrel{(i)}{=} \int_z z \frac{\mathbb{P}_{\tau \sim \mathcal{T}(x, \pi)}(A_0 = a)}{\mathbb{P}_{\tau \sim \mathcal{T}(x, \pi)}(A_0 = a|Z(\tau) = z)} \mathbb{P}_{\tau \sim \mathcal{T}(x, a, \pi)}(Z(\tau) = z) dz, \\ &= \int_z z \frac{\pi(a|x)}{h_z(a|x, z)} \mathbb{P}_{\tau \sim \mathcal{T}(x, a, \pi)}(Z(\tau) = z) dz, \\ &= \mathbb{E}_{\tau \sim \mathcal{T}(x, a, \pi)} \left[ Z(\tau) \frac{\pi(a|x)}{h_z(a|x, Z(\tau))} \right], \end{aligned}$$

where (i) follows from Bayes' rule.

□

### A.3 Proof of Theorem 3

*Proof.* Using (3), we have:

$$\begin{aligned}
\nabla_\theta V^{\pi_\theta}(x_0) &= \mathbb{E}_{\tau \sim \mathcal{T}(x_0, \pi_\theta)} \left[ \sum_a \sum_{k \geq 0} \gamma^k \nabla \pi_\theta(a|X_k) A^\pi(X_k, a) \right] \\
&= \mathbb{E}_{\tau \sim \mathcal{T}(x_0, \pi_\theta)} \left[ \sum_a \sum_{k \geq 0} \gamma^k \nabla \pi_\theta(a|X_k) \left( r(X_k, a) - r^{\pi_\theta}(X_k) + \sum_{t \geq k+1} \gamma^{t-k} \left( \frac{h_\beta(a|X_k, X_t)}{\pi_\theta(a|X_k)} - 1 \right) R_t \right) \right] \\
&= \mathbb{E}_{\tau \sim \mathcal{T}(x_0, \pi_\theta)} \left[ \sum_a \sum_{k \geq 0} \gamma^k \nabla \pi_\theta(a|X_k) \left( r(X_k, a) + \sum_{t \geq k+1} \gamma^{t-k} \frac{h_\beta(a|X_k, X_t)}{\pi_\theta(a|X_k)} R_t \right) \right].
\end{aligned}$$

where the third equality is due to  $\sum_a \nabla \pi_\theta(a|X_k) f(X_k) = f(X_k) \sum_a \nabla \pi_\theta(a|X_k) = 0$ , for  $f(X_k) = r^{\pi_\theta}(X_k) + \sum_{t \geq k+1} \gamma^{t-k} R_t$ .

Similarly, for the return version and any action  $a$ , we have:

$$\begin{aligned}
\nabla_\theta V^{\pi_\theta}(x_0) &= \mathbb{E}_{\tau \sim \mathcal{T}(x_0, \pi_\theta)} \left[ \sum_a \sum_{k \geq 0} \gamma^k \nabla \pi_\theta(a|X_k) A^\pi(X_k, a) \right] \\
&= \mathbb{E}_{\tau \sim \mathcal{T}(x_0, \pi_\theta)} \left[ \sum_a \sum_{k \geq 0} \gamma^k \pi(a|X_k) \nabla \log \pi_\theta(a|X_k) A^\pi(X_k, a) \right] \\
&= \mathbb{E}_{\tau \sim \mathcal{T}(x_0, \pi_\theta)} \left[ \sum_{k \geq 0} \gamma^k \nabla \log \pi_\theta(A_k|X_k) A^\pi(X_k, A_k) \right] \\
&= \mathbb{E}_{\tau \sim \mathcal{T}(x_0, \pi_\theta)} \left[ \sum_{k \geq 0} \gamma^k \nabla \log \pi_\theta(A_k|X_k) \left( 1 - \frac{\pi(A_k|X_k)}{h_z(A_k|X_k, Z(\tau_{k:\infty}))} \right) Z(\tau_{k:\infty}) \right].
\end{aligned}$$

□

### A.4 Proof of Proposition 1

*Proof.* We have:

$$\begin{aligned}
&\mathbb{E}_{\tau \sim \mathcal{T}(x_0, \pi)} \left[ \sum_s \gamma^s \nabla \log \pi(A_s|X_s) (Z_s(\tau) - b_s) \right] \\
&= \mathbb{E}_{\tau \sim \mathcal{T}(x_0, \pi)} \left[ \sum_s \gamma^s \nabla \log \pi(A_s|X_s) Q^\pi(X_s, A_s) \right] - \mathbb{E}_{\tau \sim \mathcal{T}(x_0, \pi)} \left[ \nabla \log \pi(A_s|X_s) b_s \right], \\
&= \nabla V(x_0) - \mathbb{E}_{\tau \sim \mathcal{T}(x_0, \pi)} \left[ \nabla \log \pi(A_s|X_s) \frac{\pi(A_s|X_s)}{h_z(A_s|X_s, Z_s(\tau))} Z_s(\tau) \right], \\
&\stackrel{(i)}{=} \nabla V(x_0) - \mathbb{E}_{\tau \sim \mathcal{T}(x_0, \pi)} \left[ \mathbb{E}_{A_s \sim \pi(\cdot|X_s)} \left[ \nabla \log \pi(A_s|X_s) \underbrace{\mathbb{E}_{\tau \sim \mathcal{T}(X_s, A_s, \pi)} \left[ \frac{\pi(A_s|X_s)}{h_z(A_s|X_s, Z_s(\tau))} Z_s(\tau) \right]}_{V^\pi(X_s)} \right] \right], \\
&= \nabla V(x_0) - \mathbb{E}_{\tau \sim \mathcal{T}(x_0, \pi)} \left[ V^\pi(X_s) \sum_{a \in \mathcal{A}} \nabla \pi(a|X_s) \right], \\
&= \nabla V(x_0).
\end{aligned}$$

where (i) follows from Theorem 2. □

## B Other variants

Analogously to Theorems 1 and 2, we can obtain the V- and Q-functions for state and return conditioning, respectively. We have:

**Theorem 4.** Consider an action  $a$  for which  $\pi(a|x) > 0$  and  $\mathbb{P}_{\tau \sim \mathcal{T}(x, \pi)}(X_k = y|A_0 = a) > 0$  for any state  $X_k$  sampled on  $\tau \sim \mathcal{T}(x, a, \pi)$ :

$$V^\pi(x) = \mathbb{E}_{\tau \sim \mathcal{T}(x, a, \pi)} \left[ \sum_{k \geq 0} \gamma^k \frac{\pi(a|x)}{h_k(a|x, X_k)} R_k \right].$$

*Proof.* We can flip the result of Lemma 1 for actions  $a$  for which  $\pi(a|x) > 0$  and  $\mathbb{P}_{\tau \sim \mathcal{T}(x, \pi)}(X_k = y|A_0 = a) > 0$ .

$$\frac{\pi(a|x)}{h_k(a|x, y)} = \frac{\mathbb{P}_{\tau \sim \mathcal{T}(x, \pi)}(X_k = y)}{\mathbb{P}_{\tau \sim \mathcal{T}(x, \pi)}(X_k = y|A_0 = a)}. \quad (11)$$

Let  $r^\pi(y) = \sum_{a \in \mathcal{A}} \pi(a|y)r(y, a)$ . We have

$$\begin{aligned} V^\pi(x) &= \mathbb{E}_{\tau \sim \mathcal{T}(x, \pi)} \left[ \sum_{k \geq 0} \gamma^k R_k \right] \\ &= \sum_{k \geq 0} \sum_{y \in \mathcal{X}} \gamma^k \mathbb{P}_{\tau \sim \mathcal{T}(x, \pi)}(X_k = y) r^\pi(y) \\ &= \sum_{k \geq 0} \sum_{y \in \mathcal{X}} \gamma^k \mathbb{P}_{\tau \sim \mathcal{T}(x, \pi)}(X_k = y|A_0 = a) \frac{\mathbb{P}_{\tau \sim \mathcal{T}(x, \pi)}(X_k = y)}{\mathbb{P}_{\tau \sim \mathcal{T}(x, \pi)}(X_k = y|A_0 = a)} r^\pi(y) \\ &= \sum_{k \geq 0} \sum_{y \in \mathcal{X}} \gamma^k \mathbb{P}_{\tau \sim \mathcal{T}(x, \pi)}(X_k = y|A_0 = a) \frac{\pi(a|x)}{h_k(a|x, y)} r^\pi(y) \\ &= \mathbb{E}_{\tau \sim \mathcal{T}(x, a, \pi)} \left[ \sum_{k \geq 0} \gamma^k \frac{\pi(a|x)}{h_k(a|x, X_k)} R_k \right]. \end{aligned}$$

□

**Theorem 5.** Consider an action  $a$  for which  $\pi(a|x) > 0$ . We have:

$$Q^\pi(x, a) = \mathbb{E}_{\tau \sim \mathcal{T}(x, \pi)} \left[ Z(\tau) \frac{h_z(a|x, Z(\tau))}{\pi(a|x)} \right]. \quad (12)$$

*Proof.* The Q-function writes:

$$\begin{aligned} Q^\pi(x, a) &= \mathbb{E}_{\tau \sim \mathcal{T}(x, a, \pi)} [Z(\tau)], \\ &= \int_z z \mathbb{P}_{\tau \sim \mathcal{T}(x, a, \pi)}(Z(\tau) = z) dz, \\ &= \int_z z \frac{\mathbb{P}_{\tau \sim \mathcal{T}(x, a, \pi)}(Z(\tau) = z)}{\mathbb{P}_{\tau \sim \mathcal{T}(x, \pi)}(Z(\tau) = z)} \mathbb{P}_{\tau \sim \mathcal{T}(x, \pi)}(Z(\tau) = z) dz, \\ &= \int_z z \frac{\mathbb{P}_{\tau \sim \mathcal{T}(x, \pi)}(Z(\tau) = z|A_0 = a)}{\mathbb{P}_{\tau \sim \mathcal{T}(x, \pi)}(Z(\tau) = z)} \mathbb{P}_{\tau \sim \mathcal{T}(x, \pi)}(Z(\tau) = z) dz, \\ &\stackrel{(i)}{=} \int_z z \frac{\mathbb{P}_{\tau \sim \mathcal{T}(x, \pi)}(A_0 = a|Z(\tau) = z)}{\mathbb{P}_{\tau \sim \mathcal{T}(x, \pi)}(A_0 = a)} \mathbb{P}_{\tau \sim \mathcal{T}(x, \pi)}(Z(\tau) = z) dz, \\ &= \int_z z \frac{h_z(a|x, z)}{\pi(a|x)} \mathbb{P}_{\tau \sim \mathcal{T}(x, \pi)}(Z(\tau) = z) dz, \\ &= \mathbb{E}_{\tau \sim \mathcal{T}(x, \pi)} \left[ Z(\tau) \frac{h_z(a|x, Z(\tau))}{\pi(a|x)} \right], \end{aligned}$$

where (i) follows from Bayes' rule. □

## C Time-Independent State-Conditional Case

We begin by introducing a time independent variant of state-conditional distribution. Let  $\beta \in [0, 1]$  and  $\rho(k) = \beta^{k-1}(1 - \beta)$  be the geometric distribution on  $k \in \mathbb{N}^+$ . Then the state-conditional distribution  $h_\beta(a|y, x)$  writes as follows for a future state  $y$ :

$$h_\beta(a|x, y) \stackrel{\text{def}}{=} \mathbb{P}_{\tau \sim \mathcal{T}(x, \pi)}(A_0 = a|X_k = y, k \sim \rho). \quad (13)$$

We draw the attention of readers to the difference between the new definition of  $h_\beta$  and the original one in Eq. 2: in this case the timestep  $k$  is a random event drawn from the distribution  $\rho$ , whereas in Eq. 2 the timestep  $k$  is a fixed scalar.

We now show that the result of Theorem 1 extends to the case of  $h_\beta$  with the choice of  $\beta = \gamma$ .

**Theorem 6.** Consider an action  $a$  and a state  $x$  for which  $\pi(a|x) > 0$ . Set the scalar  $\beta = \gamma$ . Then  $Q^\pi$  writes as

$$Q^\pi(x, a) = r(x, a) + \mathbb{E}_{\tau \sim \mathcal{T}(x, \pi)} \left[ \sum_{k \geq 1} \gamma^k \frac{h_\beta(a|x, X_k)}{\pi(a|x)} R_k \right].$$

*Proof.* Let us introduce the coefficient  $c_\gamma = \frac{\gamma}{1-\gamma}$  such that  $c_\gamma \rho(k) = \gamma^k$ . By definition of the Q-function for a state-action couple  $(x, a)$ , we have

$$Q^\pi(x, a) = r(x, a) + \sum_{k \geq 1} \sum_{y \in \mathcal{X}} \gamma^k \mathbb{P}_{\tau \sim \mathcal{T}(x, \pi)}(X_k = y | A_0 = a) r^\pi(y),$$

which can be rewritten:

$$Q^\pi(x, a) = r(x, a) + c_\gamma \sum_{y \in \mathcal{X}} \sum_{k \geq 1} \rho(k) \mathbb{P}_{\tau \sim \mathcal{T}(x, \pi)}(X_k = y | A_0 = a) r^\pi(y). \quad (14)$$

From the law of total probability and the independence between the events  $k \sim \rho$  and  $A_0 = a$ :

$$\mathbb{P}_{\tau \sim \mathcal{T}(x, \pi)}(X_k = y | A_0 = a, k \sim \rho) = \sum_{k \geq 1} \rho(k) \mathbb{P}_{\tau \sim \mathcal{T}(x, \pi)}(X_k = y | A_0 = a).$$

Combining this with Eq. (14) we deduce

$$Q^\pi(x, a) = r(x, a) + c_\gamma \sum_{y \in \mathcal{X}} \mathbb{P}_{\tau \sim \mathcal{T}(x, \pi)}(X_k = y | A_0 = a, k \sim \rho) r^\pi(y). \quad (15)$$

From applying the Bayes' rule and independence between the events  $k \sim \rho$  and  $A_0 = a$ , we have

$$\mathbb{P}_{\tau \sim \mathcal{T}(x, \pi)}(X_k = y | A_0 = a, k \sim \rho) = \frac{h_\beta(a|x, y) \mathbb{P}_{\tau \sim \mathcal{T}(x, \pi)}(X_k = y | k \sim \rho)}{\pi(a|x)}.$$

Combining this with Eq. (15) we deduce

$$\begin{aligned} Q^\pi(x, a) &= r(x, a) + c_\gamma \sum_{y \in \mathcal{X}} \mathbb{P}_{\tau \sim \mathcal{T}(x, \pi)}(X_k = y | k \sim \rho) \frac{h_\beta(a|x, y)}{\pi(a|x)} r^\pi(y), \\ &= r(x, a) + \sum_{y \in \mathcal{X}} \sum_{k \geq 1} \gamma^k \mathbb{P}_{\tau \sim \mathcal{T}(x, \pi)}(X_k = y) \frac{h_\beta(a|x, y)}{\pi(a|x)} r^\pi(y), \\ &= r(x, a) + \mathbb{E}_{\tau \sim \mathcal{T}(x, \pi)} \left[ \sum_{k \geq 1} \gamma^k \frac{h_\beta(a|X_k, x)}{\pi(a|x)} r^\pi(X_k) \right], \\ &= r(x, a) + \mathbb{E}_{\tau \sim \mathcal{T}(x, \pi)} \left[ \sum_{k \geq 1} \gamma^k \frac{h_\beta(a|X_k, x)}{\pi(a|x)} R_k \right]. \end{aligned}$$

□

We now extend the result of Theorem 6 to the case of  $T$ -step bootstrapped return. Let  $\rho_T$  be the distribution on the set  $\{1, 2, \dots, T\}$  defined as

$$\rho_T(k) \stackrel{\text{def}}{=} \begin{cases} \beta^{k-1}(1-\beta) & 1 \leq k < T \\ \beta^{T-1} & k = T \end{cases} \quad (16)$$

We also define the  $T$ -step state-conditional distribution  $h_{\beta, T}(a|y, x)$  for a future state  $y$ :

$$h_{\beta, T}(a|x, y) \stackrel{\text{def}}{=} \mathbb{P}_{\tau \sim \mathcal{T}(x, \pi)}(A_0 = a | X_k = y, k \sim \rho_T). \quad (17)$$

**Theorem 7.** Consider an action  $a$  and a state  $x$  for which  $\pi(a|x) > 0$ . Set the scalar  $\beta = \gamma$ . Then  $Q^\pi$  writes as

$$Q^\pi(x, a) = r(x, a) + \mathbb{E}_{\tau \sim \mathcal{T}(x, \pi)} \left[ \sum_{k=1}^{T-1} \gamma^k \frac{h_{\beta, T}(a|x, X_k)}{\pi(a|x)} R_k + \gamma^T \frac{h_{\beta, T}(a|x, X_T)}{\pi(a|x)} V^\pi(X_T) \right].$$

*Proof.* By definition of the Q-function for a state-action couple  $(x, a)$ , we have

$$Q^\pi(x, a) = r(x, a) + \sum_{k=1}^{T-1} \sum_{y \in \mathcal{X}} \gamma^k \mathbb{P}_{\tau \sim \mathcal{T}(x, \pi)}(X_k = y | A_0 = a) r^\pi(y) + \sum_{y \in \mathcal{X}} \gamma^T \mathbb{P}_{\tau \sim \mathcal{T}(x, \pi)}(X_T = y | A_0 = a) V^\pi(y),$$

From the definition of the (normalized) discounted visit distribution  $\tilde{d}^\pi(z|y) \stackrel{\text{def}}{=} (1 - \gamma) \sum_k \gamma^k \mathbb{P}_{\tau \sim \mathcal{T}(y, \pi)}(X_k = z)$ , we have:

$$V^\pi(y) = \frac{1}{1 - \gamma} \sum_{z \in \mathcal{X}} \tilde{d}^\pi(z|y) r^\pi(z).$$

Therefore  $Q^\pi(x, a)$  can be rewritten:

$$\begin{aligned} Q^\pi(x, a) &= r(x, a) + \sum_{k=1}^{T-1} \sum_{y \in \mathcal{X}} \gamma^k \mathbb{P}_{\tau \sim \mathcal{T}(x, \pi)}(X_k = y | A_0 = a) r^\pi(y) \\ &\quad + \frac{\gamma^T}{1 - \gamma} \sum_{y \in \mathcal{X}} \sum_{z \in \mathcal{X}} \mathbb{P}_{\tau \sim \mathcal{T}(x, \pi)}(X_T = y | A_0 = a) \tilde{d}^\pi(z|y) r^\pi(z). \end{aligned}$$

Now let us define the following distribution  $\mu_k(\cdot|y)$  for each  $(k, y)$ :

$$\mu_k(z|y) \stackrel{\text{def}}{=} \begin{cases} \mathbf{1}_{z=y} & 1 \leq k < T \\ \tilde{d}^\pi(z|y) & k = T. \end{cases} \quad (18)$$

Thus we can rewrite  $Q^\pi(x, a)$  as:

$$Q^\pi(x, a) = r(x, a) + c_\gamma \sum_{k=1}^T \sum_{y \in \mathcal{X}} \sum_{z \in \mathcal{X}} \rho_T(k) \mathbb{P}_{\tau \sim \mathcal{T}(x, \pi)}(X_k = y | A_0 = a) \mu_k(z|y) r^\pi(z).$$

From the law of total probability, independence between the events  $k \sim \rho_T$  and  $A_0 = a$  and the Markovian relation between  $X_k$  and  $Z_k$  ( $Z_k$  is a random variable with distribution  $\mu_k(\cdot|X_k)$ ):

$$\begin{aligned} \mathbb{P}_{\tau \sim \mathcal{T}(x, \pi)}(X_k = y, Z_k = z | A_0 = a, k \sim \rho_T) &= \sum_{k=1}^T \rho_T(k) \mathbb{P}_{\tau \sim \mathcal{T}(x, \pi)}(X_k = y, Z_k = z | A_0 = a), \\ &= \sum_{k \geq 1} \rho_T(k) \mathbb{P}_{\tau \sim \mathcal{T}(x, \pi)}(X_k = y | A_0 = a) \mu_k(Z_k = z | X_k = y). \end{aligned}$$

Therefore we have:

$$Q^\pi(x, a) = r(x, a) + c_\gamma \sum_{y \in \mathcal{X}} \sum_{z \in \mathcal{X}} \mathbb{P}_{\tau \sim \mathcal{T}(x, \pi)}(X_k = y, Z_k = z | A_0 = a, k \sim \rho_T) r^\pi(z).$$

Then, by applying the Bayes' rule:

$$\frac{\mathbb{P}_{\tau \sim \mathcal{T}(x, \pi)}(X_k = y, Z_k = z | A_0 = a, k \sim \rho_T)}{\mathbb{P}_{\tau \sim \mathcal{T}(x, \pi)}(A_0 = a | X_k = y, Z_k = z, k \sim \rho_T)} = \frac{\mathbb{P}_{\tau \sim \mathcal{T}(x, \pi)}(X_k = y, Z_k = z | k \sim \rho_T)}{\pi(a|x)}.$$

In addition, by the Markov property:

$$\mathbb{P}_{\tau \sim \mathcal{T}(x, \pi)}(A_0 = a | X_k = y, Z_k = z, k \sim \rho_T) = \mathbb{P}_{\tau \sim \mathcal{T}(x, \pi)}(A_0 = a | X_k = y, k \sim \rho_T),$$

$$= h_{\beta,T}(a|x, y).$$

Therefore:

$$\mathbb{P}_{\tau \sim \mathcal{T}(x, \pi)}(X_k = y, Z_k = z | A_0 = a, k \sim \rho_T) = \frac{h_{\beta,T}(a|x, y) \mathbb{P}_{\tau \sim \mathcal{T}(x, \pi)}(X_k = y, Z_k = z | k \sim \rho_T)}{\pi(a|x)}.$$

Thus, we can rewrite  $Q^\pi(x, a)$  as:

$$\begin{aligned} Q^\pi(x, a) &= r(x, a) + c_\gamma \sum_{y \in \mathcal{X}} \sum_{z \in \mathcal{X}} \frac{h_{\beta,T}(a|x, y) \mathbb{P}_{\tau \sim \mathcal{T}(x, \pi)}(X_k = y, Z_k = z | k \sim \rho_T)}{\pi(a|x)} r^\pi(z), \\ &= r(x, a) + c_\gamma \sum_{k=1}^T \sum_{y \in \mathcal{X}} \sum_{z \in \mathcal{X}} \frac{h_{\beta,T}(a|x, y) \rho_T(k) \mathbb{P}_{\tau \sim \mathcal{T}(x, \pi)}(X_k = y) \mu_k(Z = z | X_k = y)}{\pi(a|x)} r^\pi(z), \\ &= r(x, a) + \sum_{k=1}^{T-1} \gamma^k \sum_{y \in \mathcal{X}} \frac{h_{\beta,T}(a|x, y) \mathbb{P}_{\tau \sim \mathcal{T}(x, \pi)}(X_k = y)}{\pi(a|x)} r^\pi(y) \\ &\quad + \gamma^T \sum_{y \in \mathcal{X}} \sum_{z \in \mathcal{X}} \frac{h_{\beta,T}(a|x, y) \mathbb{P}_{\tau \sim \mathcal{T}(x, \pi)}(X_k = y)}{\pi(a|x)} \tilde{d}^\pi(z|y) r^\pi(z), \\ &= r(x, a) + \sum_{k=1}^{T-1} \gamma^k \sum_{y \in \mathcal{X}} \frac{h_{\beta,T}(a|x, y) \mathbb{P}_{\tau \sim \mathcal{T}(x, \pi)}(X_k = y)}{\pi(a|x)} r^\pi(y) \\ &\quad + \gamma^T \sum_{y \in \mathcal{X}} \frac{h_{\beta,T}(a|x, y) \mathbb{P}_{\tau \sim \mathcal{T}(x, \pi)}(X_k = y)}{\pi(a|x)} V^\pi(y), \\ &= r(x, a) + \mathbb{E}_{\tau \sim \mathcal{T}(x, \pi)} \left[ \sum_{k=1}^{T-1} \gamma^k \frac{h_{\beta,T}(a|x, X_k)}{\pi(a|x)} r^\pi(X_k) + \gamma^T \frac{h_{\beta,T}(a|x, X_T)}{\pi(a|x)} V^\pi(X_T) \right], \end{aligned}$$

which concludes the proof.  $\square$

## D Algorithms

---

### Algorithm 1 State-conditional HCA

---

**Given:** Initial  $\pi, h_\beta, V, \hat{r}$ ; horizon  $T$

- 1: **for**  $k = 1, \dots$  **do**
- 2:   Sample  $\tau = X_0, A_0, R_0, \dots, R_T$  from  $\pi$
- 3:   **for**  $i = 0, \dots, T - 1$  **do** ▷ Train hindsight distribution
- 4:     **for**  $j = i, \dots, T$  **do**
- 5:       Train  $h_\beta(A_i|X_i, X_j)$  via cross-entropy
- 6:     **end for**
- 7:   **end for**
- 8:   **for**  $i = 0, \dots, T - 1$  **do** ▷ Train baseline and reward predictor
- 9:      $Z = 0$
- 10:    **for**  $j = i, \dots, T - 1$  **do**
- 11:       $Z \leftarrow Z + \gamma^{j-i} R_j$
- 12:    **end for**
- 13:     $Z \leftarrow Z + \gamma^{T-i} V(X_T)$
- 14:    Update  $V(X_i)$  towards  $Z$
- 15:    Update  $\hat{r}$  towards  $R_i$
- 16:   **end for**
- 17:   **for**  $i = 0, \dots, T - 1$  **do** ▷ Train policy of all actions with the hindsight-conditioned return
- 18:     **for** all actions  $a$  **do**
- 19:        $Z_h = \pi(a|X_i, a) \hat{r}(X_i, a)$
- 20:       **for**  $j = i + 1, \dots, T - 1$  **do**
- 21:           $Z_h \leftarrow Z_h + \gamma^{j-i} \frac{h_\beta(a|X_i, X_j)}{\pi(a|X_i)} R_j$
- 22:       **end for**
- 23:        $Z_{h,a} \leftarrow Z_h + \gamma^{T-i} \frac{h_\beta(a|X_i, X_T)}{\pi(a|X_i)} V(X_T)$
- 24:     **end for**
- 25:     Follow the gradient  $\sum_a \nabla \pi(a|X_i) Z_{h,a}$
- 26:   **end for**
- 27: **end for**

---



---

### Algorithm 2 Return-conditional HCA

---

**Given:** Initial  $\pi, h_z, V$

- 1: **for**  $k = 1, \dots$  **do**
- 2:   Sample  $\tau = X_0, A_0, R_0, \dots$  from  $\pi$
- 3:   **for**  $i = 0, 1, \dots$  **do**
- 4:     Compose the return  $Z(\tau_{i:\infty})$  starting from  $X_i$
- 5:     Train  $h_z(A_i|X_i, Z_i)$  via cross-entropy
- 6:      $Z_h \leftarrow \left(1 - \frac{\pi(A_i|X_i)}{h_z(A_i|X_i, Z(\tau_{i:\infty}))}\right) Z(\tau_{i:\infty})$
- 7:     Follow the gradient  $\nabla \log \pi(A_i|X_i) Z_h$
- 8:   **end for**
- 9: **end for**

---

## E Experiment Details

The learning rate  $\alpha$  for the baseline was chosen to be the best value from  $[0.1, 0.2, 0.3, 0.4]$ , while our model hyperparameters (the learning rate  $\alpha_h$  for  $h$ , and the number of bins  $n_b$  for the return version of HCA) were selected informally to be  $\alpha = 0.3, \alpha_b = 0.4, n_b = 3$  for the results in Fig. 4, and  $n_b = 10$  elsewhere. Return HCA is sensitive to  $n_b$ , but all variants are robust to the choice of learning rate.

## F Bootstrapping with state HCA

Consider the Delayed Effect task from Section 5, in which an action causes an outcome  $T$  steps in the future, with everything in between being irrelevant. It is not immediately obvious why state HCA should be beneficial when one bootstraps with  $n < T$ . Indeed, if  $h$  was perfect, the intermediate coefficient would be uninformative. However, we observe the opposite, precisely because  $V$ ,  $\pi$  and  $h$  are being learned at the same time, but with different learning dynamics. In particular, in this case  $h$  moves faster than  $\pi$  (independently of the learning rate) as it is updated towards 1 for any observed sample, while  $\pi$  updates are modulated by the return. Now consider some interim  $V(y) < 0$ . The negative value implies that the policy at the initial state  $x$  prefers the bad action  $a$  over the good action  $b$ :  $\pi(a|x) > \pi(b|x)$ . But this in turn implies that  $h(a|x, y)$  has been observed more frequently, and since  $h$  is quicker to update:  $h(a|x, y) > \pi(a|x)$ . Now, take the policy gradient theorem (7) with  $\pi$  as a baseline. The HCA return becomes  $(h(a|x, y) - \pi(a|x))V(y) < 0$  and discourages the bad action. Similarly,  $(h(b|x, y) - \pi(b|x))V(y) > 0$  and the good action is encouraged. We tested different learning rates, and initializations, and the effect persisted.
